# Supplementary material for: Effects of Jie Yu Wan on Generalized Anxiety Disorder: A Randomized Clinical Trial
Source: Evid Based Complement Alternat Med. 2022 Apr 8;2022:9951693. doi: 10.1155/2022/9951693 (PMC9012658; doi:10.1155/2022/9951693)
Supplement: Supplementary Materials — The process of the Delphi method, the CONSORT 2010 checklist (Table S1), and the result of adverse reaction at eight weeks (Table S2) are provided as additional file. [file 9951693.f1.zip]

Archive with 3 entries (3 files):
- 9951693.f1/Process of Delphi method.docx
- 9951693.f1/Tabel S2.docx
- 9951693.f1/Table S1.doc
